# Supplementary material
Source: PubMed Central journal article supplement (PMC4959245)
Supplement: AEM.00673-16_zam999117160so1.pdf [file AEM.00673-16_zam999117160so1.pdf]

**Supplemental information for:**

**Epoxyalkane: Coenzyme M Transferase gene diversity in groundwater samples from chlorinated ethene contaminated sites**

Authors: Xikun Liu and Timothy E. Mattes\*

Department of Civil and Environmental Engineering, 4105 Seamans Center, University of Iowa,  
Iowa City, IA, 52242, USA

\*Corresponding author: Fax: (319) 335-5660

Email: [tim-mattes@uiowa.edu](mailto:tim-mattes@uiowa.edu)

Table S1. Field groundwater geochemical parameters collected from the monitoring wells in this study. These parameters and groundwater velocities were taken from the reports cited in Table 1.

| Well                                 | Sample Designation | pH                | Temperature (°C) | ORP (millivolts)    | Groundwater Flow Velocity (ft/yr) |
|--------------------------------------|--------------------|-------------------|------------------|---------------------|-----------------------------------|
| Carver, MA RB46D* (09/29/2009)       | CARV46-1           | 5.9               | 14.05            | 135                 | 277.4                             |
| Carver, MA RB64I* (09/29/2009)       | CARV64             | 5.28              | 12.04            | 152                 |                                   |
| Carver, MA RB46D (09/15/2010)        | CARV46             | 5.6               | 14.08            | 217                 |                                   |
| Carver, MA RB63I (09/15/2010)        | CARV63             | 5.91              | 13.36            | 91                  |                                   |
| Oceana, VA MW18 (08/06/2009)         | OCEA18             | 7.39              | 21.4             | -53                 | 10.0                              |
| Oceana, VA MW25 (11/21/2008)         | OCEA25             | 6.37              | 20               | -93                 |                                   |
| Soldotna, AK MW6 (05/12/2009)        | SOLD6              | 4.85              | 3.21             | 3.7                 | 54.75                             |
| Soldotna, AK MW40 (09/22/2008)       | SOLD40             | 6.11              | 6.16             | -55                 |                                   |
| Fairbanks, AK 4M (03/27/2014)        | FAIR4              | 6.26              | 4.56             | 34.8                | --                                |
| Fairbanks, AK 13M (03/27/2014)       | FAIR13             | 6.68              | 3.8              | -20.9               |                                   |
| Kotzebue, AK 10-01 (10/22/2013)      | KOTZ01             | 7.2               | 0.4              | -101.4              | --                                |
| Kotzebue, AK 10-03 (10/22/2013)      | KOTZ03             | 6.48 <sup>+</sup> | 1.9 <sup>+</sup> | -125.1 <sup>+</sup> |                                   |
| Australia 039IJ-1,3,6,7,8 (Oct.2011) | AUS39-1,3,6,7,8    | NA                | NA               | NA                  | 123.03                            |

NA: data not provided.

--: VC attenuation rates were not calculated for these sites as VC was not detected, thus groundwater flow velocities were not used in the analysis

\*These samples were used in the correlation analysis of *etnE* abundance with geochemical parameters, ethene concentrations, VC concentrations and attenuation rates, but was not included in the T-RFLP and clone library analyses.

<sup>+</sup>Kotzebue, AK 10-03: The original data sheet marked as “Parameters measured in-situ - may not represent true groundwater conditions” therefore were excluded in correlation analysis of these parameters.

Table S2. Oligonucleotide primers used in this study.

| Primer name | Sequence (5'-3')               | Product size (bp) | Reference  |
|-------------|--------------------------------|-------------------|------------|
| COM-F1L     | AACTACCCSAAYCCSCGCTGGTACGAC    | 834-891           | (1)        |
| COM-R2E     | GTCGGCAGTTTCGGTGATCGTGCTCTTGAC |                   |            |
| RTE F       | CAGAA YGGCTGYGACATYATCCA       | 151               | (2)        |
| RTE R       | CSGGYGTRCCCGAGTAGTTWCC         |                   |            |
| F131        | GGAAGCGTTCGARGAYGCSGT          | 447-453           | (3)        |
| R562        | TAGGGCCAGACRAACTCGTCGA         |                   |            |
| M13F        | GTAAAACGACGGCCAG               | 169-199           | Invitrogen |
| M13R        | CAGGAAACAGCTATGAC              |                   |            |

Table S3. Information of qPCR parameters in this study. All *etnE* genes were amplified with RTE primers. *Nocardioides* sp. strain JS614 (Genbank Accession No. CP000508) *etnE* PCR products amplified with CoM primers were used as standards. Standards were amplified from *Nocardioides* sp. strain JS614 genomic DNA. There are  $1.025 \times 10^9$  genes per ng *etnE* template. Kotzebue and Fairbanks *etnC* and *etnE* were run on the sample plate.

| Sample           | Target Gene | Flourescence threshold | Slope(-) | PCR Efficiency (%) | R <sup>2</sup> | Y-intercept |
|------------------|-------------|------------------------|----------|--------------------|----------------|-------------|
| Australia (AUS)  | <i>etnE</i> | 0.089                  | 3.31     | 100.43             | 0.993          | 38.72       |
| Kotzebue (KOTZ)  | <i>etnE</i> | 0.123                  | 3.28     | 101.6              | 0.996          | 36.79       |
| Fairbanks (FAIR) | <i>etnE</i> | 0.123                  | 3.28     | 101.6              | 0.996          | 36.79       |

Table S4. EaCoMT clone sequences (139 in total) retrieved as a result of different PCR protocols attempted to amplify EaCoMT genes from environmental samples. -: negative result; NA: not attempted

| Site                       | Well No. | Direct PCR                  | Direct PCR + second amplification | Direct touchdown PCR | Nested PCR                 | Nested PCR with touchdown   | Total clones sequenced |
|----------------------------|----------|-----------------------------|-----------------------------------|----------------------|----------------------------|-----------------------------|------------------------|
| Carver, MA (CARV)          | RB46D    | -                           | -                                 | -                    | -                          | TD CARV46 Clones 2-6, 8-10  | 8                      |
|                            | RB63I    | -                           | -                                 | -                    | -                          | TD CARV63 Clones 1-3,5-10   | 9                      |
| Soldotna, AK (SOLD)        | MW6      | -                           | -                                 | -                    | SOLD6 Clones 1-7,9,10      | TD SOLD6 Clones 1,2,5,6,8   | 14                     |
|                            | MW40     | -                           | -                                 | -                    | SOLD40 Clones 1,2,5,7,9,10 | NA                          | 6                      |
| NAS Oceana, VA (OCEA)      | MW18     | -                           | -                                 | -                    | OCEA18 Clones 1-3, 8       | TD OCEA18 Clone 2-7, 9,10   | 12                     |
|                            | MW25     | -                           | -                                 | -                    | OCEA25 Clones 1-8          | TD OCEA25 Clone 1,2,4,5,7,8 | 14                     |
| Melbourne, Australia (AUS) | 39IJ-1   | COM AUS39-1 Clone 1-8       | NA                                | NA                   | AUS39-1 Clone 1-8          | NA                          | 16                     |
|                            | 39IJ-3   | COM AUS39-3 Clone 1-4, 7-10 | NA                                | NA                   | NA                         | NA                          | 8                      |
|                            | 39IJ-6   | COM AUS39-6 Clone 1,2, 4-10 | NA                                | NA                   | AUS39-6 Clone 1,3,5-8      | NA                          | 15                     |
|                            | 39IJ-7   | COM AUS39-7 Clone 1-6, 8-10 | NA                                | NA                   | NA                         | NA                          | 9                      |
|                            | 39IJ-8   | COM AUS39-8 Clone 1-6, 9    | NA                                | NA                   | NA                         | NA                          | 7                      |
| Kotzebue, AK (KOTZ)        | MW10-01  | Faint Band                  | -                                 | NA                   | KOTZ01 Clones 1-5          | NA                          | 5                      |
|                            | MW10-03  | Faint Band                  | -                                 | NA                   | KOTZ03 Clones 1-4          | NA                          | 4                      |
| Fairbanks, AK (FAIR)       | MW-4M    | -                           | -                                 | NA                   | FAIR4 Clones 1-6           | NA                          | 6                      |
|                            | MW-13M   | -                           | -                                 | NA                   | FAIR13 Clones 1-6          | NA                          | 6                      |

Table S5. Summary of REPK (4) predicted T-RF lengths from the products of F131/R562 primers (expected size 447-453bp) when subjected to in silico digestion with the AcoI (EaeI) restriction enzyme. Groups 1-8 were used to select the enzyme employed in T-RFLP analysis. The primary criterion for restriction enzyme selection was that it can distinguish EaCoMT genes from these different groups.

| EaCoMT Group | EaCoMT gene source strain (Genbank accession no.)                                                                                                                                                                                                                                                                                               | Predicted T-RF (bp)                                          |     |
|--------------|-------------------------------------------------------------------------------------------------------------------------------------------------------------------------------------------------------------------------------------------------------------------------------------------------------------------------------------------------|--------------------------------------------------------------|-----|
| 1            | <i>Mycobacterium rhodesiae</i> strain JS60 (AY243034)<br><i>Mycobacterium</i> sp. strain JS621 (AY243039)<br><i>Ochrobactrum</i> sp. TD LBB Enrichment (DQ370436)<br><i>Ochrobactrum</i> sp. TD VC Enrichment (AY858985)<br><i>Pseudomonas putida</i> strain AJ LBB-grown (DQ370435)<br><i>Pseudomonas putida</i> strain AJ VC-grown (AY858984) | 363                                                          |     |
| 2            | <i>Mycobacterium chubuense</i> strain NBB4 (GU174752)                                                                                                                                                                                                                                                                                           | 453 (no cut)                                                 |     |
| 3            | <i>Mycobacterium gadium</i> strain JS616 (AY243036)<br><i>Mycobacterium mageritense</i> strain JS625 (AY243043)<br><i>Mycobacterium moriokaense</i> strain JS619 (AY243038)<br><i>Mycobacterium</i> sp. strain JS624 (AY243042)<br><i>Mycobacterium tusciae</i> strain JS617 (AY243037)                                                         | 24                                                           |     |
|              | <i>Mycobacterium aichiense</i> strain JS61 (AY243035)                                                                                                                                                                                                                                                                                           | 48                                                           |     |
|              | <i>Mycobacterium rhodesiae</i> strain JS622 (AY243040)<br><i>Mycobacterium</i> sp. strain JS623 (AY243041)                                                                                                                                                                                                                                      | 312                                                          |     |
|              | 4                                                                                                                                                                                                                                                                                                                                               | <i>Nocardioides</i> sp. strain JS614 (AY243042)              | 240 |
|              | 5                                                                                                                                                                                                                                                                                                                                               | <i>Nocardioides</i> sp. strain JS614 <i>etnE1</i> (CP000508) | 356 |
| 6            | <i>Gordonia rubripertincta</i> B-276 (AF426826)                                                                                                                                                                                                                                                                                                 | 149                                                          |     |
| 7            | <i>Xanthobacter</i> Py2 2-hydroxypropyl-CoM lyase (CP000782)                                                                                                                                                                                                                                                                                    | 73                                                           |     |
| 8            | <i>Haliea</i> sp. putative EaCoMT (AB691746)                                                                                                                                                                                                                                                                                                    | 151                                                          |     |
| 9            | <i>Pseudomonas putida</i> MetE (AF363277)                                                                                                                                                                                                                                                                                                       | 450                                                          |     |

Table S6. Genbank accession numbers of existing EaCoMT sequences used in phylogenetic and diversity analyses in this study

| Name                                                                    | Accession Number |
|-------------------------------------------------------------------------|------------------|
| Carver MA Well RB63I-E01                                                | GQ847819         |
| Carver MA Well RB63I-E02                                                | GQ847820         |
| Carver MA Well RB63I-E03                                                | GQ847821         |
| Carver MA Well RB73-E05                                                 | GQ847813         |
| Carver MA Well RB73-E06                                                 | GQ847814         |
| Carver MA Well RB73-E10                                                 | GQ847817         |
| Carver MA Well RB73-E11                                                 | GQ847818         |
| Carver MA Well RB63I 75pc VC L4-1                                       | KJ509931         |
| Carver MA Well RB63I 75pc VC L4-4                                       | KJ509932         |
| Carver MA Well RB63I 75pc VC L4-10                                      | KJ509933         |
| Carver MA Well RB63I 75pc VC L9-1                                       | KJ509934         |
| Carver MA Well RB63I 75pc VC L9-4                                       | KJ509935         |
| Carver MA Well RB63I 75pc VC L9-8                                       | KJ509936         |
| <i>Mycobacterium chubuense</i> strain NBB4                              | GU174752         |
| <i>Nocardioides</i> sp. strain JS614                                    | AY772007         |
| <i>Nocardioides</i> sp. strain JS614 <i>etnE1</i>                       | CP000508         |
| <i>Mycobacterium rhodesiae</i> strain JS60                              | AY243034         |
| <i>Mycobacterium aichiense</i> strain JS61                              | AY243035         |
| <i>Mycobacterium gadium</i> strain JS616                                | AY243036         |
| <i>Mycobacterium tusciae</i> strain JS617                               | AY243037         |
| <i>Mycobacterium moriokaense</i> strain JS619                           | AY243038         |
| <i>Mycobacterium</i> sp. strain JS621                                   | AY243039         |
| <i>Mycobacterium rhodesiae</i> strain JS622                             | AY243040         |
| <i>Mycobacterium</i> sp. strain JS623                                   | AY243041         |
| <i>Mycobacterium</i> sp JS623 mutant 1                                  | FJ602755         |
| <i>Mycobacterium</i> sp. JS623 mutant 5                                 | FJ602759         |
| <i>Mycobacterium</i> sp. JS623 mutant 4                                 | FJ602758         |
| <i>Mycobacterium</i> sp. JS623 mutant 3                                 | FJ602757         |
| <i>Mycobacterium</i> sp. JS623 mutant 2                                 | FJ602756         |
| <i>Mycobacterium</i> sp. strain JS624                                   | AY243042         |
| <i>Mycobacterium mageritense</i> strain JS625                           | AY243043         |
| <i>Pseudomonas putida</i> strain AJ VC Enrichment                       | AY858984         |
| <i>Pseudomonas putida</i> strain AJ LBB Enrichment                      | DQ370435         |
| <i>Ochrobactrum</i> sp. TD VC Enrichment                                | AY858985         |
| <i>Ochrobactrum</i> sp. TD LBB Enrichment                               | DQ370436         |
| <i>Gordonia rubripertincta</i> ( <i>Rhodococcus rhodochrous</i> ) B-276 | AF426826         |
| <i>Haliea</i> sp. ETY-M                                                 | AB691746         |
| <i>Xanthobacter</i> Py2 2-hydroxypropyl-CoM lyase                       | CP000782         |

Table S7. Genbank accession numbers of MetE sequences used as outgroup sequences in phylogenetic tree construction.

| Genus, Species and Strain                                   | Genbank accession: genome location<br>(Protein ID)  | MetE<br>Group |
|-------------------------------------------------------------|-----------------------------------------------------|---------------|
| <i>Mycobacterium tusciae</i><br>JS617                       | NZ_KI912270.1:1983765-1984775<br>(WP_006245687.1)   | 1             |
| <i>Mycobacterium smegmatis</i><br>JS623                     | CP003078.1:2183169-2184179<br>(AGB22566.1)          | 1             |
| <i>Mycobacterium chubuense</i><br>NBB4                      | CP003053.1:1895804-1896820<br>(AFM16616.1)          | 1             |
| <i>Mycobacterium smegmatis</i><br>str. mc <sup>2</sup> -155 | NC_018289.1:2441701-2442711<br>(WP_011728293.1)     | 1             |
| <i>Gordonia</i><br><i>polyisoprenivorans</i> VH2            | CP003119.1:3444186-3445205<br>(AFA74057.1)          | 1             |
|                                                             | CP003119.1:1951183-1952208<br>(AFA72765.1)          | 2             |
| <i>Pseudomonas putida</i>                                   | AF363277.1 (AAK29462.1)                             | 2             |
| <i>Pseudomonas putida</i> DOT-<br>T1E                       | CP003734.1:2956795-2957880<br>(AFO48541.1)          | 2             |
| <i>Nocardioides</i> sp.<br>URHA0032                         | NZ_JIAV01000019.1:158602-159720<br>(WP_028637114.1) | 2             |
| <i>Xanthomonas oryzae</i> pv.<br><i>oryzae</i> PXO86        | CP007166.1:476362-477390<br>(AJQ81599.1)            | 2             |
| <i>Xanthomonas citri</i> subsp.<br><i>citri</i> strain UI7  | CP008989.1:401372-402400<br>(AJY80461.1)            | 2             |



Table S8. Genbank accession number of representative clones in this study.

| Clone ID            | Genbank Accession Number |
|---------------------|--------------------------|
| TD CARV 63 Clone 10 | KR936138.1               |
| TD CARV46 Clone 10  | KR936139.1               |
| TD CARV 63 Clone 1  | KR936140.1               |
| TD CARV46 Clone 3   | KR936141.1               |
| OCEA25 Clone 8      | KR936142.1               |
| OCEA18 Clone 2      | KR936143.1               |
| TD OCEA18 Clone 10  | KR936144.1               |
| OCEA18 Clone 1      | KR936145.1               |
| OCEA18 Clone 2      | KR936146.1               |
| OCEA18 Clone 3      | KR936147.1               |
| OCEA25 Clone 1      | KR936148.1               |
| OCEA25 Clone 2      | KR936149.1               |
| OCEA25 Clone 4      | KR936150.1               |
| SOLD6 Clone 2       | KR936151.1               |
| SOLD6 Clone 8       | KR936152.1               |
| SOLD6 Clone 1       | KR936153.1               |
| SOLD6 Clone 3       | KR936154.1               |
| SOLD6 Clone 6       | KR936155.1               |
| SOLD40 Clone 1      | KR936156.1               |
| KOTZ03 Clone 2      | KR936157.1               |
| KOTZ01 Clone 3      | KR936158.1               |
| KOTZ01 Clone 1      | KR936159.1               |
| FAIR4 Clone 2       | KR936160.1               |
| FAIR13 Clone 3      | KR936161.1               |
| FAIR4 Clone 1       | KR936162.1               |
| COM AUS39-1 Clone 1 | KR936163.1               |
| COM AUS39-1 Clone 2 | KR936164.1               |
| COM AUS39-1 Clone 3 | KR936165.1               |
| COM AUS39-1 Clone 4 | KR936166.1               |
| COM AUS39-1 Clone 7 | KR936167.1               |

Table S9. Summary of EaCoMT sequences found in the MG-RAST metagenomics database by July 2015. MG-RAST metagenome numbers are provided, along with the sample source and location, the top BLAST hit, abundance of each EaCoMT gene type in the sample, % identity and average amino acid alignment length.

| Metagenome | Sample Source     | Location               | Top Hit in BLAST                                                                    | Abundance | % ID   | Avg. Align Length (aa) |
|------------|-------------------|------------------------|-------------------------------------------------------------------------------------|-----------|--------|------------------------|
| 4508942.3  | Agricultural soil | Richmond, Indiana, USA | epoxyalkane coenzyme M transferase mutant 1<br><i>Mycobacterium</i> sp. JS623       | 1         | 85.19  | 54                     |
|            |                   |                        | epoxyalkane coenzyme M transferase, uncultured bacteria                             | 1         | 74.14  | 58                     |
| 4516651.3  | Air               | Beijing, China         | epoxyalkane: coenzyme M transferase<br><i>Nocardioides</i> sp. JS614                | 124       | 84.47  | 26.483                 |
|            |                   |                        | epoxyalkane:coenzyme M transferase<br><i>Rhodococcus rhodochrous</i>                | 51        | 86.245 | 27.72                  |
|            |                   |                        | epoxyalkane:coenzyme M transferase<br><i>Mycobacterium chubuense</i> NBB4           | 14        | 83.062 | 22.462                 |
|            |                   |                        | epoxyalkane coenzyme M transferase, uncultured bacteria (JS614-like)                | 10        | 84.458 | 23                     |
|            |                   |                        | epoxyalkane coenzyme M transferase, uncultured bacteria (JS614-like)                | 9         | 71.18  | 24.625                 |
|            |                   |                        | epoxyalkane coenzyme M transferase, uncultured bacteria (JS614-like)                | 8         | 83.664 | 27.231                 |
|            |                   |                        | epoxyalkane coenzyme M transferase, uncultured bacteria (JS623-like)                | 5         | 77.66  | 23.556                 |
|            |                   |                        | epoxyalkane coenzyme M transferase mutant 1<br><i>Mycobacterium</i> sp. JS623       | 7         | 84.549 | 23.714                 |
|            |                   |                        | putative epoxyalkane:coenzyme M transferase<br><i>Taylorella equigenitalis</i> MCE9 | 75        | 78.742 | 25.232                 |

|           |                          |                                      |                                                                                                                                                                         |    |        |        |
|-----------|--------------------------|--------------------------------------|-------------------------------------------------------------------------------------------------------------------------------------------------------------------------|----|--------|--------|
|           |                          |                                      | putative epoxyalkane:coenzyme M transferase<br><i>Corynebacterium aurimucosum</i> ATCC 700975                                                                           | 70 | 82.491 | 26.886 |
|           |                          |                                      | putative epoxyalkane:coenzyme M transferase<br><i>Rhodobacterales</i> bacterium HTCC2654                                                                                | 40 | 74.761 | 25.043 |
|           |                          |                                      | putative epoxyalkane:coenzyme M transferase<br><i>Nitrococcus mobilis</i> Nb-231                                                                                        | 17 | 75.884 | 23.462 |
| 4497384.3 | Bulk Soil                | Anazonia, Brazil                     | 2-hydroxypropyl-CoM lyase (EC 4.4.1.23)<br>(Epoxyalkane:CoM transferase) (EaCoMT) (Aliphatic<br>epoxide carboxylation component I),<br><i>Bacillus tusciae</i> DSM 2912 | 1  | 80     | 15     |
| 4537093.3 | Marine<br>Sediment       | Santa Barbara, CA,<br>USA            | epoxyalkane coenzyme M transferase,<br>uncultured bacteria (JS623 and JS614-like)                                                                                       | 14 | 66.61  | 32.17  |
| 4520078.3 | Livestock<br>body fluid  | Ellinbank,<br>Victoria,<br>Australia | 2-hydroxypropyl-CoM lyase (EC 4.4.1.23)<br>(Epoxyalkane:CoM transferase) (EaCoMT) (Aliphatic<br>epoxide carboxylation component I),<br><i>Bacillus tusciae</i> DSM 2912 | 1  | 84.62  | 13     |
| 4470378.3 | Permafrost<br>Soil (DNA) | Active Layer                         | epoxyalkane coenzyme M transferase,<br>uncultured bacteria (JS623 and JS614-like)                                                                                       | 13 | 72.9   | 31.97  |
|           |                          |                                      | epoxyalkane coenzyme M transferase mutant 3 ,<br><i>Mycobacterium</i> sp. JS623                                                                                         | 1  | 60     | 30     |
|           |                          |                                      | epoxyalkane coenzyme M transferase mutant 1<br><i>Mycobacterium</i> sp. JS623                                                                                           | 5  | 75.51  | 33.8   |
|           |                          |                                      | epoxyalkane coenzyme M transferase mutant 5 ,<br><i>Mycobacterium</i> sp. JS623                                                                                         | 1  | 72.97  | 37     |
| 4491382.3 | Permafrost<br>Soil (RNA) | Active Layer                         | epoxyalkane coenzyme M transferase,<br>uncultured bacteria (JS614-like)                                                                                                 | 4  | 73.29  | 37.25  |
|           |                          |                                      | epoxyalkane coenzyme M transferase,<br>uncultured bacteria (JS623-like)                                                                                                 | 2  | 69.4   | 42     |
|           |                          |                                      | epoxyalkane coenzyme M transferase mutant 1<br><i>Mycobacterium</i> sp. JS623                                                                                           | 1  | 78.26  | 46     |



|           |                           |                           |                                                                            |   |        |        |
|-----------|---------------------------|---------------------------|----------------------------------------------------------------------------|---|--------|--------|
| 4470381.3 | Permafrost Soil           | Thermokarst Bog           | epoxyalkane coenzyme M transferase, <i>Mycobacterium</i> sp. JS623         | 2 | 66.115 | 32     |
|           |                           |                           | epoxyalkane coenzyme M transferase mutant 1 <i>Mycobacterium</i> sp. JS623 | 1 | 63.89  | 39     |
| 4477875.3 | Bulk Soil                 | Misiones, Argentina       | epoxyalkane coenzyme M transferase mutant 1 <i>Mycobacterium</i> sp. JS623 | 1 | 62.5   | 24     |
| 4524575.3 | Rhizosphere Soil          | Golm, Germany             | epoxyalkane coenzyme M transferase mutant 1 <i>Mycobacterium</i> sp. JS623 | 1 | 82.98  | 47     |
|           |                           |                           | epoxyalkane coenzyme M transferase, uncultured bacteria (JS614-like)       | 2 | 71.7   | 50.5   |
| 4480863.3 | Anaerobic digester sludge | Ithaca, New York, USA     | epoxyalkane coenzyme M transferase, uncultured bacteria (JS623-like)       | 2 | 66.03  | 20.5   |
| 4481985.3 | River Sediment            | Southeastern Montana, USA | epoxyalkane coenzyme M transferase, uncultured bacteria (JS614-like)       | 1 | 84.62  | 13     |
|           |                           |                           | epoxyalkane coenzyme M transferase, uncultured bacteria (JS623-like)       | 3 | 80.77  | 16.33  |
|           |                           |                           | epoxyalkane coenzyme M transferase, uncultured bacteria (JS623-like)       | 1 | 71.43  | 21     |
|           |                           |                           | epoxyalkane coenzyme M transferase, uncultured bacteria (JS623-like)       | 1 | 66.67  | 21     |
|           |                           |                           | epoxyalkane coenzyme M transferase, uncultured bacteria (JS614-like)       | 2 | 73.43  | 23     |
| 4541641.3 | Bulk Soil                 | Cedar Creek, MN, USA      | epoxyalkane coenzyme M transferase, uncultured bacteria (JS614-like)       | 9 | 74.577 | 41.334 |
|           |                           |                           | epoxyalkane coenzyme M transferase, <i>Mycobacterium</i> sp. JS623         | 8 | 76.636 | 42.875 |
|           |                           |                           | epoxyalkane coenzyme M transferase, uncultured bacteria (JS623-like)       | 3 | 78.367 | 42.667 |

|           |                  |                            |                                                                            |   |        |        |
|-----------|------------------|----------------------------|----------------------------------------------------------------------------|---|--------|--------|
|           |                  |                            | epoxyalkane coenzyme M transferase, uncultured bacteria (JS614-like)       | 5 | 69.074 | 37.4   |
|           |                  |                            | epoxyalkane coenzyme M transferase, uncultured bacteria (JS614-like)       | 2 | 69.416 | 37.5   |
|           |                  |                            | epoxyalkane coenzyme M transferase, uncultured bacteria (JS623-like)       | 1 | 77.42  | 31     |
| 4480704.3 | Dust             | Chad Desert, Chad          | epoxyalkane coenzyme M transferase, uncultured bacteria (JS614-like)       | 1 | 82.76  | 29     |
|           |                  |                            | epoxyalkane coenzyme M transferase, <i>Mycobacterium</i> sp. JS623         | 3 | 75.107 | 27.333 |
|           |                  |                            | epoxyalkane coenzyme M transferase, uncultured bacteria (JS623-like)       | 5 | 83.036 | 23.4   |
|           |                  |                            | epoxyalkane coenzyme M transferase, uncultured bacteria (JS623-like)       | 1 | 92.86  | 14     |
|           |                  |                            | epoxyalkane coenzyme M transferase, uncultured bacteria (JS614-like)       | 1 | 72.22  | 18     |
|           |                  |                            | epoxyalkane coenzyme M transferase, uncultured bacteria (JS614-like)       | 6 | 80.638 | 27.5   |
|           |                  |                            | epoxyalkane coenzyme M transferase, uncultured bacteria (JS623-like)       | 2 | 77.78  | 27     |
|           |                  |                            | epoxyalkane coenzyme M transferase mutant 1 <i>Mycobacterium</i> sp. JS623 | 2 | 72.425 | 29     |
| 4523235.3 | Paddy Field Soil | Changshu, China            | epoxyalkane coenzyme M transferase, uncultured bacteria (JS614-like)       | 1 | 75.86  | 29     |
| 4477900.3 | Bulk Soil        | Garwood Valley, Antarctica | epoxyalkane coenzyme M transferase, uncultured bacteria (JS614-like)       | 1 | 84.62  | 13     |
|           |                  |                            | epoxyalkane coenzyme M transferase, uncultured bacteria (JS623-like)       | 3 | 84.843 | 22     |

|           |                       |                           |                                                                                             |    |        |        |
|-----------|-----------------------|---------------------------|---------------------------------------------------------------------------------------------|----|--------|--------|
|           |                       |                           | epoxyalkane coenzyme M transferase, uncultured bacteria (JS623-like)                        | 1  | 62.5   | 24     |
| 4564114.3 | Sea Sediment          | Elba, Mediteranian, Italy | putative epoxyalkane:coenzyme M transferase, <i>Nitrococcus mobilis</i> Nb-231              | 3  | 67.65  | 73.667 |
|           |                       |                           | epoxyalkane:coenzyme M transferase, <i>Mycobacterium chubuense</i> NBB4                     | 1  | 52.46  | 61     |
| 4512589.3 | Oil Contaminated Soil | Varenes, QC, Canada       | epoxyalkane coenzyme M transferase, uncultured bacteria (JS623-like)                        | 2  | 77.27  | 22     |
| 4511145.3 | Soil                  | Loma Ridge, CA, USA       | putative epoxyalkane:coenzyme M transferase, <i>Nitrococcus mobilis</i> Nb-231              | 1  | 73.33  | 30     |
|           |                       |                           | putative epoxyalkane:coenzyme M transferase, <i>Taylorella equigenitalis</i> MCE9           | 1  | 78.26  | 23     |
| 4529836.3 | Soil                  | Koeln, Germany            | epoxyalkane: coenzyme M transferase, <i>Nocardioides</i> sp. JS614                          | 26 | 74.377 | 33.122 |
|           |                       |                           | epoxyalkane:coenzyme M transferase, <i>Mycobacterium tusciae</i> JS617                      | 1  | 82.5   | 40     |
|           |                       |                           | epoxyalkane:coenzyme M transferase, <i>Mycobacterium chubuense</i> NBB4                     | 6  | 63.101 | 36.636 |
|           |                       |                           | epoxyalkane:coenzyme M transferase, <i>Rhodococcus rhodochrous</i>                          | 15 | 72.168 | 36.379 |
| 4554870.3 | Aquatic microbial mat | Kowary, Poland            | putative epoxyalkane:coenzyme M transferase, <i>Nitrococcus mobilis</i> Nb-231              | 1  | 84.38  | 32     |
|           |                       |                           | putative epoxyalkane:coenzyme M transferase, <i>Rhodobacterales</i> bacterium HTCC2654      | 1  | 61.11  | 54     |
| 4484670.3 | Chyme                 | Salt Lake City, UT, USA   | putative epoxyalkane:coenzyme M transferase, <i>Taylorella equigenitalis</i> MCE9           | 3  | 80.888 | 23.2   |
|           |                       |                           | putative epoxyalkane:coenzyme M transferase, <i>Corynebacterium aurimucosum</i> ATCC 700975 | 1  | 84     | 25     |

|                                                                 |                         |                          |                                                                                        |     |        |        |
|-----------------------------------------------------------------|-------------------------|--------------------------|----------------------------------------------------------------------------------------|-----|--------|--------|
| 4530091.3                                                       | Forest organic material | Johnsbach, Austria       | epoxyalkane: coenzyme M transferase, <i>Nocardioides</i> sp. JS614                     | 8   | 72.674 | 32.732 |
|                                                                 |                         |                          | epoxyalkane: coenzyme M transferase, <i>Mycobacterium rhodesiae</i> JS60               | 1   | 61.54  | 39     |
|                                                                 |                         |                          | epoxyalkane coenzyme M transferase, uncultured bacteria (JS623-like)                   | 1   | 89.29  | 28     |
|                                                                 |                         |                          | putative epoxyalkane:coenzyme M transferase, <i>Rhodobacterales</i> bacterium HTCC2654 | 35  | 69.874 | 37.47  |
|                                                                 |                         |                          | putative epoxyalkane:coenzyme M transferase, <i>Nitrococcus mobilis</i> Nb-231         | 3   | 74.857 | 34.333 |
| 4482593.3                                                       | Tundra Soil             | Daring Lake, NWT, Canada | epoxyalkane: coenzyme M transferase, <i>Nocardioides</i> sp. JS614                     | 142 | 80.226 | 29.636 |
|                                                                 |                         |                          | epoxyalkane:coenzyme M transferase, <i>Rhodococcus rhodochrous</i>                     | 41  | 79.474 | 28.875 |
|                                                                 |                         |                          | epoxyalkane:coenzyme M transferase, <i>Mycobacterium chubuense</i> NBB4                | 40  | 79.054 | 27.405 |
|                                                                 |                         |                          | epoxyalkane: coenzyme M transferase, <i>Mycobacterium rhodesiae</i> JS60               | 20  | 76.425 | 29.2   |
|                                                                 |                         |                          | epoxyalkane: coenzyme M transferase, <i>Mycobacterium rhodesiae</i>                    | 10  | 76.455 | 27     |
|                                                                 |                         |                          | epoxyalkane:coenzyme M transferase, <i>Mycobacterium tusciae</i> JS617                 | 6   | 71.198 | 31.833 |
|                                                                 |                         |                          | epoxyalkane:coenzyme M transferase, <i>Mycobacterium</i> sp. JS621                     | 5   | 79.76  | 27.2   |
|                                                                 |                         |                          | epoxyalkane:coenzyme M transferase, <i>Ochrobactrum</i> sp. TD                         | 4   | 74.803 | 24.75  |
|                                                                 |                         |                          | epoxyalkane:coenzyme M transferase, <i>Mycobacterium mageritense</i>                   | 4   | 76.825 | 25     |
| epoxyalkane:coenzyme M transferase, <i>Mycobacterium gadium</i> | 2                       | 72.857                   | 27                                                                                     |     |        |        |



|           |                  |                          |                                                                                             |    |        |        |
|-----------|------------------|--------------------------|---------------------------------------------------------------------------------------------|----|--------|--------|
|           |                  |                          | epoxyalkane coenzyme M transferase, uncultured bacteria (JS623-like)                        | 23 | 75.773 | 28.739 |
|           |                  |                          | epoxyalkane coenzyme M transferase, uncultured bacteria (JS614-like)                        | 12 | 71.595 | 30.304 |
|           |                  |                          | epoxyalkane coenzyme M transferase mutant 1 <i>Mycobacterium</i> sp. JS623                  | 17 | 77.505 | 30.273 |
|           |                  |                          | epoxyalkane coenzyme M transferase mutant 5 <i>Mycobacterium</i> sp. JS623                  | 5  | 81.377 | 25.444 |
|           |                  |                          | putative epoxyalkane:coenzyme M transferase, <i>Nitrococcus mobilis</i> Nb-231              | 55 | 76.949 | 22.399 |
|           |                  |                          | putative epoxyalkane:coenzyme M transferase, <i>Rhodobacteriales</i> bacterium HTCC2654     | 52 | 71.176 | 25.935 |
|           |                  |                          | putative epoxyalkane:coenzyme M transferase, <i>Taylorella equigenitalis</i> MCE9           | 45 | 73.13  | 23.891 |
|           |                  |                          | putative epoxyalkane:coenzyme M transferase, <i>Corynebacterium aurimucosum</i> ATCC 700975 | 37 | 74.491 | 22.331 |
| 4494863.3 | Activated Sludge | Xiangcheng, Henan, China | epoxyalkane: coenzyme M transferase, <i>Nocardioides</i> sp. JS614                          | 1  | 84.62  | 13     |
|           |                  |                          | epoxyalkane:coenzyme M transferase, <i>Mycobacterium rhodesiae</i> JS60                     | 1  | 66.67  | 21     |
| 4508039.3 | Marine Sediment  | Gulf of Mexico, USA      | putative epoxyalkane:coenzyme M transferase, <i>Corynebacterium aurimucosum</i> ATCC 700975 | 1  | 84.62  | 13     |
| 4502924.3 | Arable Soil      | Auburn, IL, USA          | epoxyalkane:coenzyme M transferase, <i>Mycobacterium chubuense</i> NBB4                     | 33 | 67.86  | 23.365 |
|           |                  |                          | epoxyalkane:coenzyme M transferase, <i>Rhodococcus rhodochrous</i>                          | 21 | 75.322 | 23.256 |
|           |                  |                          | epoxyalkane:coenzyme M transferase, <i>Mycobacterium tusciae</i> JS617                      | 3  | 62.145 | 26.5   |
|           |                  |                          | epoxyalkane:coenzyme M transferase, <i>Mycobacterium rhodesiae</i> JS60                     | 3  | 68.965 | 24.75  |

|           |             |                       |                                                                               |    |        |        |
|-----------|-------------|-----------------------|-------------------------------------------------------------------------------|----|--------|--------|
|           |             |                       | epoxyalkane: coenzyme M transferase,<br><i>Nocardioides</i> sp. JS614         | 59 | 71.111 | 23.065 |
|           |             |                       | epoxyalkane coenzyme M transferase,<br>uncultured bacteria (JS614-like)       | 4  | 68.733 | 29     |
|           |             |                       | epoxyalkane coenzyme M transferase mutant 1<br><i>Mycobacterium</i> sp. JS623 | 2  | 79.15  | 16     |
| 4502926.3 | Arable Soil | Mansfield, IL,<br>USA | epoxyalkane: coenzyme M transferase,<br><i>Nocardioides</i> sp. JS614         | 97 | 75.81  | 21.961 |
|           |             |                       | epoxyalkane:coenzyme M transferase,<br><i>Mycobacterium chubuense</i> NBB4    | 34 | 70.866 | 22.079 |
|           |             |                       | epoxyalkane:coenzyme M transferase,<br><i>Rhodococcus rhodochrous</i>         | 21 | 73.414 | 23.897 |
|           |             |                       | epoxyalkane coenzyme M transferase,<br>uncultured bacteria (JS623-like)       | 5  | 76.389 | 22     |
|           |             |                       | epoxyalkane coenzyme M transferase,<br>uncultured bacteria (JS614-like)       | 5  | 83.666 | 24.8   |
|           |             |                       | epoxyalkane coenzyme M transferase mutant 1<br><i>Mycobacterium</i> sp. JS623 | 7  | 82.629 | 23.429 |
|           |             |                       | epoxyalkane coenzyme M transferase mutant 4<br><i>Mycobacterium</i> sp. JS623 | 3  | 75.657 | 30.667 |
| 4502927.3 | Arable Soil | Urbana, IL, USA       | epoxyalkane:coenzyme M transferase,<br><i>Mycobacterium chubuense</i> NBB4    | 46 | 72.736 | 22.416 |
|           |             |                       | epoxyalkane:coenzyme M transferase,<br><i>Rhodococcus rhodochrous</i>         | 44 | 70.166 | 23.228 |
|           |             |                       | epoxyalkane:coenzyme M transferase,<br><i>Mycobacterium tusciae</i> JS617     | 3  | 84.207 | 29     |
|           |             |                       | epoxyalkane: coenzyme M transferase<br><i>Nocardioides</i> sp. JS614          | 99 | 71.358 | 22.421 |
|           |             |                       | epoxyalkane coenzyme M transferase,<br>uncultured bacteria (JS623-like)       | 5  | 78.918 | 22     |

|           |                    |     |                                                                                                |     |        |        |
|-----------|--------------------|-----|------------------------------------------------------------------------------------------------|-----|--------|--------|
|           |                    |     | epoxyalkane coenzyme M transferase mutant 5<br><i>Mycobacterium</i> sp. JS623                  | 3   | 85.12  | 15.333 |
|           |                    |     | putative epoxyalkane:coenzyme M transferase,<br><i>Nitrococcus mobilis</i> Nb-231              | 252 | 74.985 | 23.502 |
|           |                    |     | putative epoxyalkane:coenzyme M transferase,<br><i>Rhodobacteriales</i> bacterium HTCC2654     | 174 | 74.938 | 22.701 |
|           |                    |     | putative epoxyalkane:coenzyme M transferase,<br><i>Taylorella equigenitalis</i> MCE9           | 167 | 73.661 | 21.975 |
|           |                    |     | putative epoxyalkane:coenzyme M transferase,<br><i>Corynebacterium aurimucosum</i> ATCC 700975 | 109 | 72.434 | 23.424 |
| 4469540.3 | Permafrost<br>Soil | USA | epoxyalkane:coenzyme M transferase,<br><i>Mycobacterium chubuense</i> NBB4                     | 4   | 77.81  | 27     |
|           |                    |     | epoxyalkane:coenzyme M transferase,<br><i>Rhodococcus rhodochrous</i>                          | 4   | 77.235 | 27.5   |
|           |                    |     | epoxyalkane:coenzyme M transferase,<br><i>Mycobacterium rhodesiae</i> JS60                     | 2   | 75.313 | 29.667 |
|           |                    |     | epoxyalkane coenzyme M transferase mutant 1<br><i>Mycobacterium</i> sp. JS623                  | 1   | 76.47  | 17     |
|           |                    |     | epoxyalkane coenzyme M transferase,<br>uncultured bacteria (JS623-like)                        | 3   | 81.96  | 24     |
|           |                    |     | epoxyalkane coenzyme M transferase,<br>uncultured bacteria (JS614-like)                        | 3   | 86.49  | 37     |
|           |                    |     | epoxyalkane coenzyme M transferase mutant 5<br><i>Mycobacterium</i> sp. JS623                  | 1   | 80.65  | 31     |
|           |                    |     | putative epoxyalkane:coenzyme M transferase,<br><i>Rhodobacteriales</i> bacterium HTCC2654     | 44  | 75.44  | 20.278 |
|           |                    |     | putative epoxyalkane:coenzyme M transferase,<br><i>Nitrococcus mobilis</i> Nb-231              | 23  | 73.278 | 25.726 |

|           |                             |                            |                                                                                                                                                                        |    |        |        |
|-----------|-----------------------------|----------------------------|------------------------------------------------------------------------------------------------------------------------------------------------------------------------|----|--------|--------|
|           |                             |                            | putative epoxyalkane:coenzyme M transferase,<br><i>Taylorella equigenitalis</i> MCE9                                                                                   | 16 | 71.455 | 22.304 |
| 4520035.3 | Intertidal<br>Sediment      | Plum Island, USA           | epoxyalkane: coenzyme M transferase<br><i>Nocardioides</i> sp. JS614                                                                                                   | 1  | 84.54  | 17.778 |
|           |                             |                            | epoxyalkane:coenzyme M transferase,<br><i>Mycobacterium chubuense</i> NBB4                                                                                             | 1  | 64     | 25     |
|           |                             |                            | putative epoxyalkane:coenzyme M transferase,<br><i>Rhodobacteriales</i> bacterium HTCC2654                                                                             | 5  | 77.142 | 41.5   |
| 4508984.3 | Sea water                   | Kalvhagefjorden,<br>Sweden | 2-hydroxypropyl-CoM lyase (EC 4.4.1.23) (Epoxyalkane:CoM<br>transferase) (EaCoMT)<br>(Aliphatic epoxide carboxylation component I)<br><i>Bacillus tusciae</i> DSM 2912 | 1  | 100    | 10     |
| 4472705.3 | Mucus,<br>Human<br>Microbe  | USA                        | 2-hydroxypropyl-CoM lyase (EC 4.4.1.23) (Epoxyalkane:CoM<br>transferase) (EaCoMT)<br>(Aliphatic epoxide carboxylation component I)<br><i>Bacillus tusciae</i> DSM 2912 | 1  | 84.62  | 13     |
| 4519770.3 | Oil<br>contaminated<br>soil | Houston, TX, USA           | 2-hydroxypropyl-CoM lyase (EC 4.4.1.23) (Epoxyalkane:CoM<br>transferase) (EaCoMT) (Aliphatic epoxide carboxylation<br>component I)<br><i>Bacillus tusciae</i> DSM 2912 | 1  | 84.62  | 13     |
| 4460182.3 | Estuarine<br>bulk water     | Puget Sound, WA,<br>USA    | putative epoxyalkane:coenzyme M transferase,<br><i>Kocuria rhizophila</i> DC2201                                                                                       | 1  | 55     | 80     |
| 4582806.3 | Soil                        | Dumpas West,<br>Malaysia   | epoxyalkane coenzyme M transferase,<br>uncultured bacteria (JS614-like)                                                                                                | 8  | 75.597 | 81.875 |
|           |                             |                            | epoxyalkane coenzyme M transferase,<br>uncultured bacteria (JS614-like)                                                                                                | 4  | 78.925 | 38.5   |
|           |                             |                            | epoxyalkane coenzyme M transferase,<br>uncultured bacteria (JS623-like)                                                                                                | 3  | 78.52  | 44     |
|           |                             |                            | epoxyalkane: coenzyme M transferase<br><i>Nocardioides</i> sp. JS614                                                                                                   | 30 | 81.419 | 54.1   |

|           |                                          |                    |                                                                                            |    |        |        |
|-----------|------------------------------------------|--------------------|--------------------------------------------------------------------------------------------|----|--------|--------|
|           |                                          |                    | epoxyalkane:coenzyme M transferase<br><i>Rhodococcus rhodochrous</i>                       | 10 | 78.844 | 53     |
|           |                                          |                    | epoxyalkane:coenzyme M transferase<br><i>Mycobacterium tusciae</i> JS617                   | 1  | 78.57  | 42     |
|           |                                          |                    | epoxyalkane coenzyme M transferase mutant 1<br><i>Mycobacterium</i> sp. JS623              | 1  | 57.89  | 57     |
|           |                                          |                    | epoxyalkane coenzyme M transferase mutant 2<br><i>Mycobacterium</i> sp. JS623              | 2  | 57.451 | 47     |
|           |                                          |                    | epoxyalkane coenzyme M transferase mutant 3<br><i>Mycobacterium</i> sp. JS623              | 2  | 71.155 | 32.5   |
|           |                                          |                    | epoxyalkane coenzyme M transferase mutant 5<br><i>Mycobacterium</i> sp. JS623              | 1  | 51.791 | 56     |
|           |                                          |                    | putative epoxyalkane:coenzyme M transferase,<br><i>Nitrococcus mobilis</i> Nb-231          | 24 | 65.98  | 44.417 |
|           |                                          |                    | putative epoxyalkane:coenzyme M transferase,<br><i>Rhodobacteriales</i> bacterium HTCC2654 | 17 | 68.826 | 43.177 |
|           |                                          |                    | putative epoxyalkane:coenzyme M transferase,<br><i>Taylorella equigenitalis</i> MCE9       | 5  | 66.18  | 40.4   |
| 4554871.3 | Gold Mine<br>Aquatic<br>Microbial<br>Mat | Zolty Stok, Poland | epoxyalkane:coenzyme M transferase,<br><i>Mycobacterium chubuense</i> NBB4                 | 7  | 65.253 | 37.429 |
|           |                                          |                    | epoxyalkane:coenzyme M transferase<br><i>Rhodococcus rhodochrous</i>                       | 2  | 59.795 | 42.5   |

Table S10. Examples of EaCoMT sequences in VC-, ethene- and propene-assimilating bacteria that are incorrectly annotated as MetE sequences in Genbank.

| Genus, Species and Strain                             | Genbank accession: genome location (Protein ID) | Genbank annotation                              | Uniprot annotation (accession no.; % identity)                                        | % identity (ID) with top EaCoMT BLAST hit                   |
|-------------------------------------------------------|-------------------------------------------------|-------------------------------------------------|---------------------------------------------------------------------------------------|-------------------------------------------------------------|
| <i>Mycobacterium</i> sp. JS617                        | NZ_KI912270.1: 4898170-4899279 (WP_006247398.1) | methionine synthase (cobalamin-independent)     | Epoxyalkane coenzyme M transferase (B9VTP0; 97.6% to <i>Mycobacterium</i> sp. JS623)* | 99% ID with JS617 EaCoMT gene (AY243037.1)                  |
| <i>Mycobacterium</i> sp. JS623                        | CP003078.1: 1868236-1869345 (AGB22266.1)        |                                                 | Epoxyalkane coenzyme M transferase (B9VTP0; 100%)*                                    | 100% ID with JS623 EaCoMT gene (AY243041)                   |
| <i>Mycobacterium chubuense</i> strain NBB4            | YP_006442905 (WP_014805821.1)                   |                                                 | Epoxyalkane:coenzyme M transferase (D2K2D7; 100%)                                     | 94% ID with JS623 EaCoMT gene (ACM61851)                    |
| <i>Nocardioides</i> sp. JS614                         | CP000508.1: 134268-135380 (ABL79394.1)          | methionine synthase (B12-independent) (plasmid) | Epoxyalkane:coenzyme M transferase (Q5U9J8; 100%)                                     | 100% ID with JS614 EaCoMT gene (AY772007.1)                 |
|                                                       | NC_008697.1: 134268-135380 (WP_011751519.1)     | methionine synthase                             | Epoxyalkane:coenzyme M transferase (Q5U9J8;100%)                                      | 100% ID with JS614 EaCoMT gene (AY772007.1)                 |
| <i>Xanthobacter autotrophicus</i> Py2 plasmid pXAUT01 | CP000782.1: 81145-82275 (ABS70076.1)            | methionine synthase (vitamin-B12 independent)   | 2-hydroxypropyl-CoM lyase (Q56837; 100%)                                              | 72% ID with putative <i>Haliea</i> EaCoMT gene (AB691746.2) |
|                                                       | CP000782.1: 266692-267822 (ABS70245.1)          |                                                 | 2-hydroxypropyl-CoM lyase (Q56837l; 100%)                                             | Apparent duplication of CP000782.1:81145-82275              |

\* These genes also had Uniprot hits to Methionine synthase II (Cobalamin independent) from *Mycobacterium* sp. strain JS623 (L0IWC5)

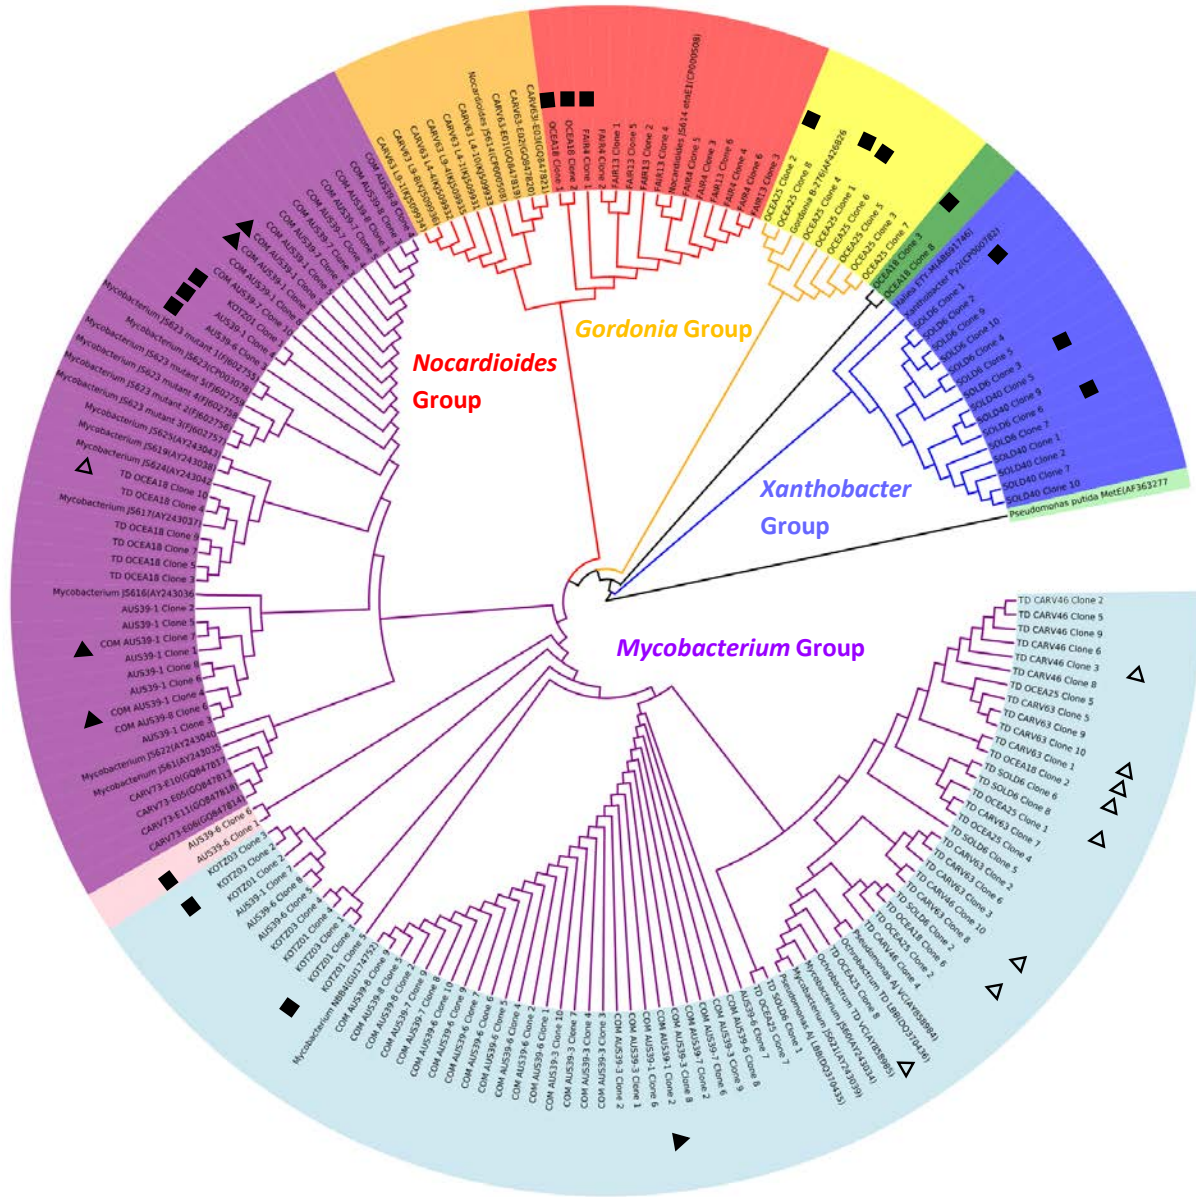

Figure S1. A phylogenetic tree depicting the relationship of deduced EaCoMT sequences from environmental samples in this study (Table S2), enrichment cultures and isolates from Genbank (Table S5). Genes are colored by group. The clones used for amino acid tree (Fig. 2) were marked with symbols. The symbols refer to the PCR amplification method used: ▲ Direct PCR; ■ Nested PCR; △ Nested PCR with a touchdown modification. A total of 178 sequences were aligned with ClustalW (5) and trimmed to 464 bp (including gaps) in MEGA5 (6, 7). The circle tree was constructed using the maximum likelihood (7) method with *Pseudomonas putida MetE* gene (8) as the outgroup. The circular tree was visualized using EvolView (9).

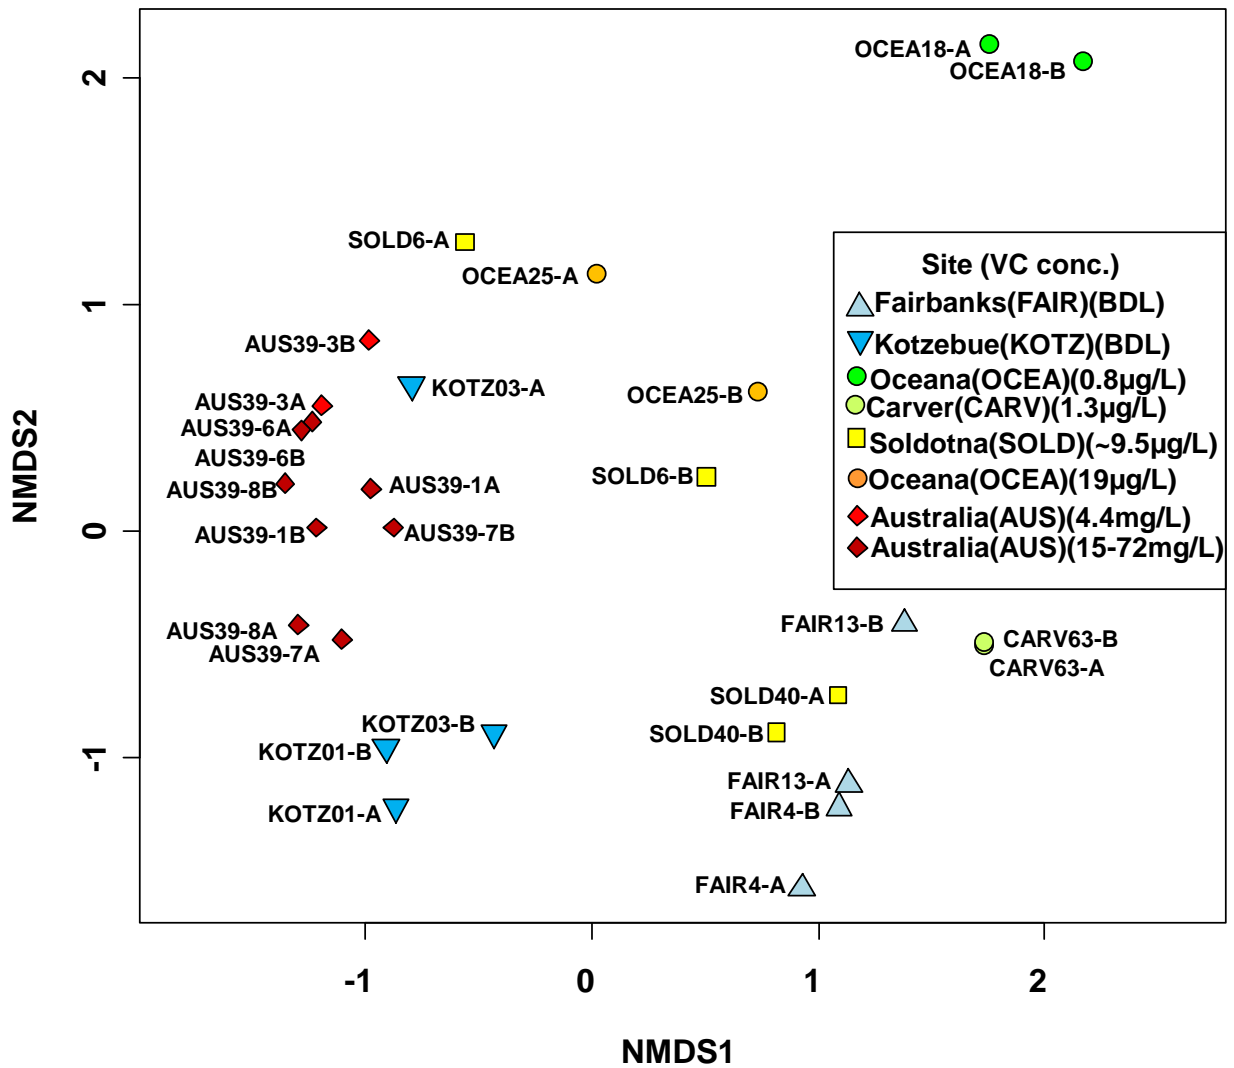

Figure S2. NMDS ordination of EaCoMT gene T-RFLP profiles from different groundwater samples. Sample identifiers are formatted by site, well number, and replicate (A or B). VC concentrations estimated in each of the wells is provided for reference. The final stress was 0.1402.



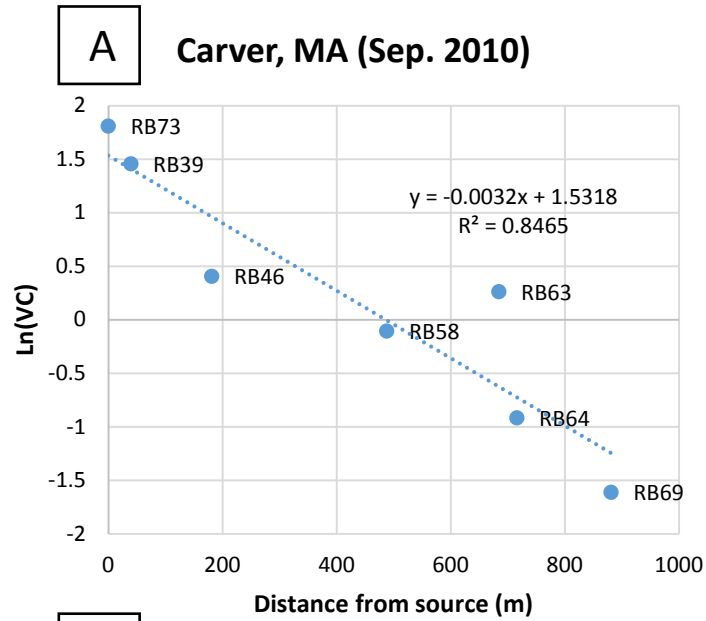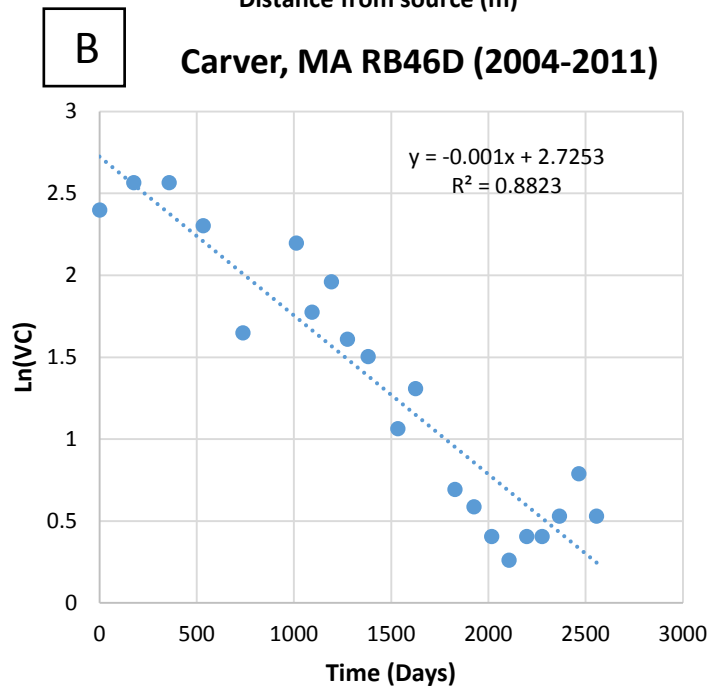

Figure S3. Examples of bulk VC attenuation rate ( $k_{\text{bulk}}$ ) (A) and point VC decay rate ( $k_{\text{point}}$ ) (B) calculations. To estimate the  $k_{\text{bulk}}$ , a transect was developed across source zone and selected wells on the map, then the natural log of VC concentration from each well was plotted against the distance between each well and the source zone. Linear regression was performed and the  $k_{\text{bulk}}$  is equal to slope times groundwater flow rate (Table S2). To estimate the  $k_{\text{point}}$ , the  $\ln$  VC concentration was plotted against time and a linear regression was performed. The  $k_{\text{point}}$  is equal to the slope (unit conversions should be made if necessary). The retardation factor for VC was assumed to be 1.7.

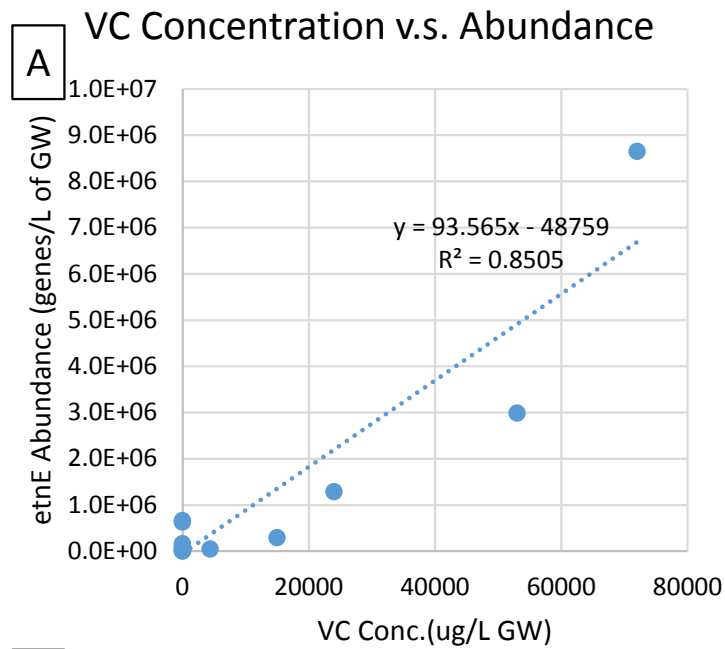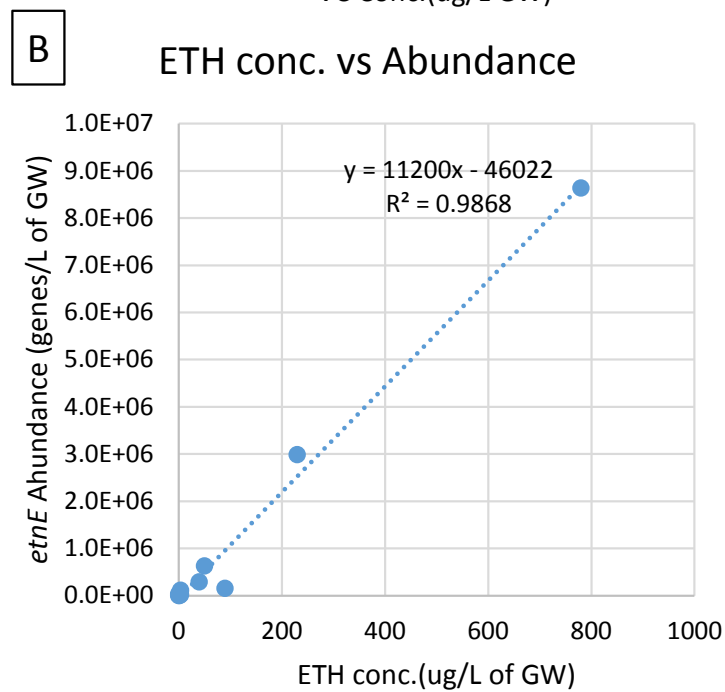

Figure S4. Linear regression of EaCoMT gene (*etnE*) abundance with vinyl chloride (VC) (A) and ethene (B) concentration. Each data point represents a sampling well from the sites surveyed in this study (Table 1).

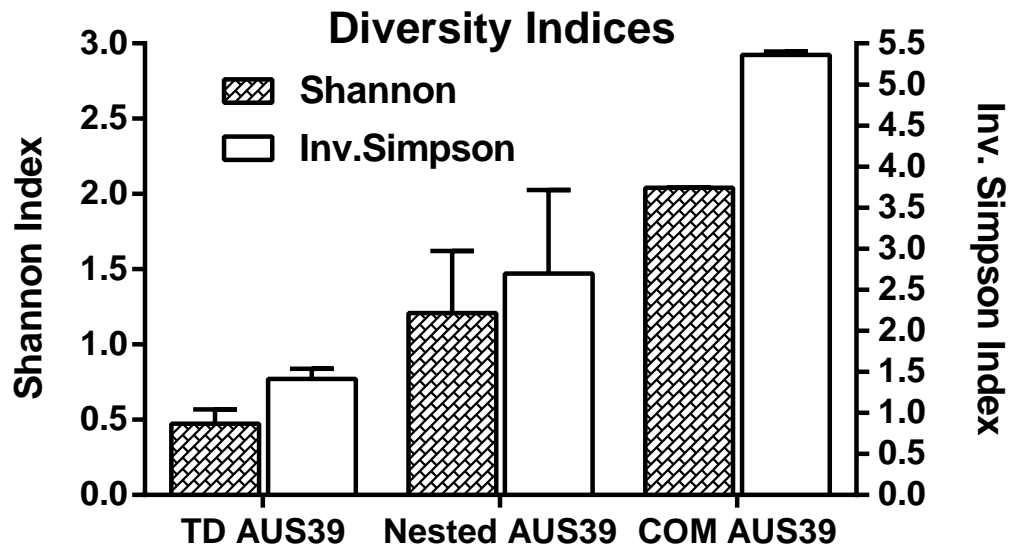

Figure S5. Analysis of potential bias introduced by touch down and nested PCR. A composite DNA sample from Australia (AUS39) was used for T-RFLP analysis of EaCoMT genes. Shannon-Wiener and inverse Simpson diversity indices (48) were calculated based on the T-RFLP profiles. Bar heights represent the average of duplicate T-RFLP analyses and the error bars represent the range. All the T-RFs <48 bp and >453 bp were excluded. The COM, Nested and TD designation indicates where the COM primer set, nested PCR and touchdown-nested PCR methods were used for T-RFLP.

## References

1. **Coleman NV, Spain JC.** 2003. Distribution of the coenzyme m pathway of epoxide metabolism among ethene- and vinyl chloride-degrading Mycobacterium strains. *Applied and Environmental Microbiology* **69**:6041-6046.
2. **Jin YO, Mattes TE.** 2010. A quantitative PCR assay for aerobic, vinyl chloride- and ethene-assimilating microorganisms in groundwater. *Environ Sci Technol* **44**:9036-9041.
3. **Begley JF, Hansen E, Wells AK, Fogel S, Begley GS.** 2009. Assessment and monitoring tools for aerobic bioremediation of vinyl chloride in groundwater. *Remediat J* **20**:107-117.
4. **Collins RE, Rocap G.** 2007. REPK: an analytical web server to select restriction endonucleases for terminal restriction fragment length polymorphism analysis. *Nucleic Acids Res* **35**:W58-W62.
5. **Thompson JD, Gibson TJ, Higgins DG.** 2002. Multiple sequence alignment using ClustalW and ClustalX. *Curr Protoc Bioinformatics* **Chapter 2**:Unit 2.3.
6. **Tamura K, Dudley J, Nei M, Kumar S.** 2007. MEGA4: molecular evolutionary genetics analysis (MEGA) software version 4.0. *Molec Biol Evol* **24**:1596-1599.
7. **Tamura K, Peterson D, Peterson N, Stecher G, Nei M, Kumar S.** 2011. MEGA5: molecular evolutionary genetics analysis using maximum likelihood, evolutionary distance, and maximum parsimony methods. *Molec Biol Evol* **28**:2731-2739.
8. **Alaminos M, Ramos JL.** 2001. The methionine biosynthetic pathway from homoserine in *Pseudomonas putida* involves the *metW*, *metX*, *metZ*, *metH* and *metE* gene products. *Arch Microbiol* **176**:151-154.
9. **Zhang HK, Gao SH, Lercher MJ, Hu SN, Chen WH.** 2012. EvolView, an online tool for visualizing, annotating and managing phylogenetic trees. *Nucleic Acids Res* **40**:W569-W572.
